# Supplementary material
Source: publisher figshare collection journal article supplement (https://acs.figshare.com/ndownloader/files/4189027)
Supplement: Supplementary file 1 [file 4189027]

  
data_bd75ass 
  
_audit_creation_method            SHELXL-97 
_chemical_name_systematic 
; 
 ? 
; 
_chemical_name_common             ? 
_chemical_melting_point           ? 
_chemical_formula_moiety 
 'C13 H11 N2 O2, C13 H10 N2 O2, H2 O, Cl' 
_chemical_formula_sum 
 'C26 H23 Cl N4 O5' 
_chemical_formula_weight          506.93 
  
loop_ 
 _atom_type_symbol 
 _atom_type_description 
 _atom_type_scat_dispersion_real 
 _atom_type_scat_dispersion_imag 
 _atom_type_scat_source 
 'C'  'C'   0.0033   0.0016 
 'International Tables Vol C Tables 4.2.6.8 and 6.1.1.4' 
 'H'  'H'   0.0000   0.0000 
 'International Tables Vol C Tables 4.2.6.8 and 6.1.1.4' 
 'N'  'N'   0.0061   0.0033 
 'International Tables Vol C Tables 4.2.6.8 and 6.1.1.4' 
 'O'  'O'   0.0106   0.0060 
 'International Tables Vol C Tables 4.2.6.8 and 6.1.1.4' 
 'Cl'  'Cl'   0.1484   0.1585 
 'International Tables Vol C Tables 4.2.6.8 and 6.1.1.4' 
  
_symmetry_cell_setting            Orthorhombic 
_symmetry_space_group_name_H-M    'P n a 21' 
_symmetry_space_group_name_Hall   'P 2c -2n' 
loop_ 
 _symmetry_equiv_pos_as_xyz 
 'x, y, z' 
 '-x, -y, z+1/2' 
 'x+1/2, -y+1/2, z' 
 '-x+1/2, y+1/2, z+1/2' 
  
_cell_length_a                    18.3527(8) 
_cell_length_b                    7.6789(4) 
_cell_length_c                    16.5549(8) 
_cell_angle_alpha                 90.00 
_cell_angle_beta                  90.00 
_cell_angle_gamma                 90.00 
_cell_volume                      2333.06(19) 
_cell_formula_units_Z             4 
_cell_measurement_temperature     100(2) 
_cell_measurement_reflns_used     5108 
_cell_measurement_theta_min       2.460 
_cell_measurement_theta_max       24.498 
  
_exptl_crystal_description        plate 
_exptl_crystal_colour             colorless 
_exptl_crystal_size_max           0.40 
_exptl_crystal_size_mid           0.24 
_exptl_crystal_size_min           0.02 
_exptl_crystal_density_meas       ? 
_exptl_crystal_density_diffrn     1.443 
_exptl_crystal_density_method     'not measured' 
_exptl_crystal_F_000              1056 
_exptl_absorpt_coefficient_mu     0.211 
_exptl_absorpt_correction_type    multi-scan 
_exptl_absorpt_correction_T_min   0.8926 
_exptl_absorpt_correction_T_max   1.0000 
_exptl_absorpt_process_details    'SADABS Version 2.05 (Bruker, 2001)' 
  
_exptl_special_details 
; 
 ? 
; 
  
_diffrn_ambient_temperature       100(2) 
_diffrn_radiation_wavelength      0.71073 
_diffrn_radiation_type            MoK\a 
_diffrn_radiation_source          'fine-focus sealed tube' 
_diffrn_radiation_monochromator   graphite 
_diffrn_measurement_device_type   'Bruker SMART APEX CCD diffractometer' 
_diffrn_measurement_method        'omega scans' 
_diffrn_detector_area_resol_mean  ? 
_diffrn_standards_number          ? 
_diffrn_standards_interval_count  ? 
_diffrn_standards_interval_time   ? 
_diffrn_standards_decay_%         ? 
_diffrn_reflns_number             28587 
_diffrn_reflns_av_R_equivalents   0.0622 
_diffrn_reflns_av_sigmaI/netI     0.0416 
_diffrn_reflns_limit_h_min        -22 
_diffrn_reflns_limit_h_max        22 
_diffrn_reflns_limit_k_min        -9 
_diffrn_reflns_limit_k_max        9 
_diffrn_reflns_limit_l_min        -20 
_diffrn_reflns_limit_l_max        20 
_diffrn_reflns_theta_min          2.22 
_diffrn_reflns_theta_max          26.41 
_reflns_number_total              4779 
_reflns_number_gt                 4140 
_reflns_threshold_expression      >2sigma(I) 
  
_computing_data_collection        'SMART Version 5.625 (Bruker, 2001)' 
_computing_cell_refinement        'SAINT-Plus Version 6.45 (Bruker, 2001)' 
_computing_data_reduction         'SAINT-Plus Version 6.45 (Bruker, 2001)' 
_computing_structure_solution     'SHELXS-97 (Sheldrick, 1990)' 
_computing_structure_refinement   'SHELXL-97 (Sheldrick, 1997)' 
_computing_molecular_graphics     various 
_computing_publication_material   'SHELXTL Version 6.14 (Bruker, 2000)' 
  
_refine_special_details 
; 
O-H distances restrained to be similar 
  
 Refinement of F^2^ against ALL reflections.  The weighted R-factor wR and 
 goodness of fit S are based on F^2^, conventional R-factors R are based 
 on F, with F set to zero for negative F^2^. The threshold expression of 
 F^2^ > 2sigma(F^2^) is used only for calculating R-factors(gt) etc. and is 
 not relevant to the choice of reflections for refinement.  R-factors based 
 on F^2^ are statistically about twice as large as those based on F, and R- 
 factors based on ALL data will be even larger. 
; 
  
_refine_ls_structure_factor_coef  Fsqd 
_refine_ls_matrix_type            full 
_refine_ls_weighting_scheme       calc 
_refine_ls_weighting_details 
 'calc w=1/[\s^2^(Fo^2^)+(0.0517P)^2^+0.0367P] where P=(Fo^2^+2Fc^2^)/3' 
_atom_sites_solution_primary      direct 
_atom_sites_solution_secondary    difmap 
_atom_sites_solution_hydrogens    geom 
_refine_ls_hydrogen_treatment     mixed 
_refine_ls_extinction_method      none 
_refine_ls_extinction_coef        ? 
_refine_ls_abs_structure_details 
 'Flack H D (1983), Acta Cryst. A39, 876-881' 
_refine_ls_abs_structure_Flack    0.37(7) 
_refine_ls_number_reflns          4779 
_refine_ls_number_parameters      338 
_refine_ls_number_restraints      2 
_refine_ls_R_factor_all           0.0527 
_refine_ls_R_factor_gt            0.0424 
_refine_ls_wR_factor_ref          0.0962 
_refine_ls_wR_factor_gt           0.0912 
_refine_ls_goodness_of_fit_ref    1.052 
_refine_ls_restrained_S_all       1.052 
_refine_ls_shift/su_max           0.000 
_refine_ls_shift/su_mean          0.000 
  
loop_ 
 _atom_site_label 
 _atom_site_type_symbol 
 _atom_site_fract_x 
 _atom_site_fract_y 
 _atom_site_fract_z 
 _atom_site_U_iso_or_equiv 
 _atom_site_adp_type 
 _atom_site_occupancy 
 _atom_site_symmetry_multiplicity 
 _atom_site_calc_flag 
 _atom_site_refinement_flags 
 _atom_site_disorder_assembly 
 _atom_site_disorder_group 
C1 C 0.17395(13) 0.5225(3) 0.46291(16) 0.0205(6) Uani 1 1 d . . . 
C2 C 0.24751(12) 0.6036(4) 0.47799(16) 0.0228(6) Uani 1 1 d . . . 
H2A H 0.2599 0.6871 0.4345 0.027 Uiso 1 1 calc R . . 
H2B H 0.2858 0.5131 0.4805 0.027 Uiso 1 1 calc R . . 
C3 C 0.24061(13) 0.6974(3) 0.55913(16) 0.0227(6) Uani 1 1 d . . . 
H3A H 0.2740 0.6455 0.5995 0.027 Uiso 1 1 calc R . . 
H3B H 0.2524 0.8225 0.5532 0.027 Uiso 1 1 calc R . . 
C4 C 0.16273(12) 0.6740(3) 0.58448(15) 0.0175(5) Uani 1 1 d . . . 
C5 C 0.05217(12) 0.5345(3) 0.52746(15) 0.0183(5) Uani 1 1 d . . . 
C6 C 0.02781(12) 0.3708(3) 0.55370(15) 0.0174(5) Uani 1 1 d . . . 
C7 C 0.05582(12) 0.0905(3) 0.60452(18) 0.0231(5) Uani 1 1 d . . . 
H7 H 0.0916 0.0077 0.6200 0.028 Uiso 1 1 calc R . . 
C8 C -0.01806(12) 0.0483(3) 0.61065(17) 0.0242(6) Uani 1 1 d . . . 
H8 H -0.0327 -0.0625 0.6304 0.029 Uiso 1 1 calc R . . 
C9 C -0.06876(13) 0.1684(3) 0.58792(16) 0.0230(6) Uani 1 1 d . . . 
H9 H -0.1191 0.1410 0.5921 0.028 Uiso 1 1 calc R . . 
C10 C -0.04743(13) 0.3330(3) 0.55831(16) 0.0199(6) Uani 1 1 d . . . 
C11 C -0.09748(12) 0.4643(4) 0.53471(17) 0.0235(6) Uani 1 1 d . . . 
H11 H -0.1484 0.4429 0.5379 0.028 Uiso 1 1 calc R . . 
C12 C -0.07276(13) 0.6214(4) 0.50748(18) 0.0263(6) Uani 1 1 d . . . 
H12 H -0.1068 0.7078 0.4911 0.032 Uiso 1 1 calc R . . 
C13 C 0.00238(13) 0.6573(4) 0.50340(16) 0.0224(6) Uani 1 1 d . . . 
H13 H 0.0187 0.7670 0.4839 0.027 Uiso 1 1 calc R . . 
C14 C 0.34228(13) 0.6489(3) 0.77472(16) 0.0201(6) Uani 1 1 d . . . 
C15 C 0.26343(13) 0.6644(4) 0.79904(16) 0.0249(6) Uani 1 1 d . . . 
H15A H 0.2318 0.5997 0.7610 0.030 Uiso 1 1 calc R . . 
H15B H 0.2481 0.7879 0.7998 0.030 Uiso 1 1 calc R . . 
C16 C 0.25892(12) 0.5855(4) 0.88356(16) 0.0227(6) Uani 1 1 d . . . 
H16A H 0.2438 0.6744 0.9235 0.027 Uiso 1 1 calc R . . 
H16B H 0.2235 0.4883 0.8848 0.027 Uiso 1 1 calc R . . 
C17 C 0.33474(13) 0.5208(3) 0.90162(17) 0.0195(6) Uani 1 1 d . . . 
C18 C 0.45609(12) 0.5306(3) 0.83605(15) 0.0186(6) Uani 1 1 d . . . 
C19 C 0.48079(13) 0.3633(3) 0.81132(15) 0.0195(5) Uani 1 1 d . . . 
C20 C 0.45621(15) 0.0872(4) 0.76674(18) 0.0279(6) Uani 1 1 d . . . 
H20 H 0.4221 -0.0014 0.7536 0.033 Uiso 1 1 calc R . . 
C21 C 0.53073(15) 0.0485(4) 0.75842(18) 0.0311(6) Uani 1 1 d . . . 
H21 H 0.5457 -0.0622 0.7389 0.037 Uiso 1 1 calc R . . 
C22 C 0.58095(14) 0.1702(4) 0.77840(17) 0.0268(6) Uani 1 1 d . . . 
H22 H 0.6315 0.1456 0.7733 0.032 Uiso 1 1 calc R . . 
C23 C 0.55722(13) 0.3360(3) 0.80713(16) 0.0221(6) Uani 1 1 d . . . 
C24 C 0.60586(14) 0.4704(4) 0.82801(17) 0.0266(6) Uani 1 1 d . . . 
H24 H 0.6569 0.4517 0.8247 0.032 Uiso 1 1 calc R . . 
C25 C 0.57964(13) 0.6274(4) 0.85297(18) 0.0262(6) Uani 1 1 d . . . 
H25 H 0.6126 0.7175 0.8675 0.031 Uiso 1 1 calc R . . 
C26 C 0.50386(14) 0.6572(4) 0.85738(16) 0.0226(6) Uani 1 1 d . . . 
H26 H 0.4862 0.7668 0.8754 0.027 Uiso 1 1 calc R . . 
N1 N 0.12800(10) 0.5731(3) 0.52577(13) 0.0183(5) Uani 1 1 d . . . 
N2 N 0.07630(11) 0.2453(3) 0.57726(11) 0.0182(4) Uani 1 1 d . . . 
H2 H 0.1240(16) 0.266(3) 0.5762(16) 0.031(8) Uiso 1 1 d . . . 
N3 N 0.37957(10) 0.5652(3) 0.83720(13) 0.0178(5) Uani 1 1 d . . . 
N4 N 0.43053(12) 0.2381(3) 0.79159(12) 0.0237(5) Uani 1 1 d . . . 
O1 O 0.15410(9) 0.4296(2) 0.40791(12) 0.0265(4) Uani 1 1 d . . . 
O2 O 0.13271(9) 0.7284(2) 0.64399(10) 0.0230(4) Uani 1 1 d . . . 
O3 O 0.37122(10) 0.6967(2) 0.71278(11) 0.0259(4) Uani 1 1 d . . . 
O4 O 0.35618(9) 0.4431(2) 0.96054(12) 0.0255(4) Uani 1 1 d . . . 
O5 O 0.27023(11) 0.2309(3) 0.78681(12) 0.0356(5) Uani 1 1 d D . . 
H5A H 0.2641(15) 0.234(4) 0.7312(15) 0.036(8) Uiso 1 1 d D . . 
H5B H 0.3202(14) 0.230(4) 0.789(2) 0.062(11) Uiso 1 1 d D . . 
Cl1 Cl 0.23763(3) 0.24811(9) 0.59969(5) 0.02683(14) Uani 1 1 d . . . 
  
loop_ 
 _atom_site_aniso_label 
 _atom_site_aniso_U_11 
 _atom_site_aniso_U_22 
 _atom_site_aniso_U_33 
 _atom_site_aniso_U_23 
 _atom_site_aniso_U_13 
 _atom_site_aniso_U_12 
C1 0.0170(11) 0.0220(14) 0.0226(15) 0.0042(12) 0.0024(11) 0.0032(11) 
C2 0.0137(12) 0.0284(15) 0.0264(15) 0.0055(11) 0.0015(10) 0.0009(11) 
C3 0.0162(12) 0.0257(13) 0.0262(14) 0.0048(11) -0.0026(10) -0.0034(10) 
C4 0.0169(11) 0.0163(11) 0.0192(14) 0.0031(10) -0.0019(10) -0.0008(10) 
C5 0.0131(11) 0.0250(15) 0.0166(12) 0.0004(11) 0.0004(9) -0.0001(10) 
C6 0.0141(11) 0.0230(13) 0.0151(13) -0.0030(10) -0.0003(9) 0.0024(10) 
C7 0.0228(12) 0.0246(13) 0.0220(12) 0.0005(13) 0.0033(11) 0.0035(10) 
C8 0.0254(12) 0.0211(12) 0.0262(14) -0.0030(13) 0.0047(11) -0.0035(10) 
C9 0.0194(11) 0.0284(14) 0.0210(15) -0.0029(11) 0.0056(11) -0.0066(11) 
C10 0.0141(12) 0.0256(14) 0.0202(14) -0.0031(12) 0.0006(10) -0.0005(10) 
C11 0.0103(11) 0.0322(16) 0.0281(15) -0.0023(12) -0.0004(10) -0.0011(11) 
C12 0.0186(13) 0.0283(16) 0.0321(16) 0.0041(12) -0.0009(11) 0.0067(11) 
C13 0.0191(12) 0.0221(14) 0.0261(15) 0.0026(11) -0.0002(11) -0.0007(10) 
C14 0.0169(12) 0.0221(13) 0.0211(14) -0.0046(11) -0.0016(10) 0.0013(10) 
C15 0.0172(12) 0.0322(15) 0.0251(14) -0.0009(11) -0.0017(11) 0.0007(11) 
C16 0.0152(12) 0.0276(14) 0.0253(14) -0.0003(11) 0.0017(10) 0.0014(11) 
C17 0.0167(12) 0.0207(14) 0.0210(15) -0.0012(12) 0.0017(10) -0.0009(10) 
C18 0.0143(12) 0.0241(15) 0.0172(13) 0.0034(11) 0.0002(10) 0.0017(10) 
C19 0.0209(13) 0.0209(13) 0.0166(13) 0.0028(11) 0.0028(10) -0.0001(10) 
C20 0.0362(15) 0.0224(14) 0.0250(15) -0.0008(12) 0.0056(13) -0.0055(12) 
C21 0.0417(16) 0.0234(14) 0.0283(15) 0.0013(12) 0.0135(13) 0.0095(12) 
C22 0.0230(14) 0.0304(15) 0.0271(16) 0.0081(13) 0.0074(11) 0.0105(12) 
C23 0.0178(12) 0.0286(14) 0.0199(14) 0.0079(12) 0.0014(10) 0.0051(11) 
C24 0.0151(12) 0.0398(18) 0.0251(15) 0.0061(13) -0.0015(11) 0.0038(12) 
C25 0.0157(12) 0.0325(16) 0.0305(16) 0.0011(13) -0.0051(11) -0.0041(11) 
C26 0.0209(13) 0.0226(14) 0.0244(15) 0.0002(12) -0.0007(11) 0.0008(11) 
N1 0.0132(9) 0.0208(11) 0.0209(11) 0.0019(9) 0.0006(8) 0.0003(9) 
N2 0.0128(10) 0.0229(11) 0.0189(11) 0.0000(11) 0.0027(7) 0.0004(9) 
N3 0.0136(10) 0.0213(11) 0.0186(11) 0.0011(9) 0.0019(8) 0.0020(9) 
N4 0.0257(12) 0.0221(11) 0.0233(11) 0.0006(12) 0.0030(9) 0.0005(10) 
O1 0.0231(9) 0.0313(11) 0.0252(11) -0.0032(9) 0.0006(8) 0.0012(8) 
O2 0.0221(9) 0.0251(10) 0.0218(9) 0.0007(8) 0.0012(7) -0.0009(8) 
O3 0.0232(9) 0.0329(11) 0.0214(10) 0.0032(8) 0.0004(8) 0.0028(8) 
O4 0.0222(9) 0.0304(11) 0.0239(10) 0.0065(9) 0.0006(8) 0.0012(8) 
O5 0.0224(10) 0.0595(15) 0.0250(10) -0.0032(10) 0.0025(8) -0.0043(10) 
Cl1 0.0150(2) 0.0374(3) 0.0281(3) 0.0062(3) -0.0007(3) 0.0037(3) 
  
_geom_special_details 
; 
 All esds (except the esd in the dihedral angle between two l.s. planes) 
 are estimated using the full covariance matrix.  The cell esds are taken 
 into account individually in the estimation of esds in distances, angles 
 and torsion angles; correlations between esds in cell parameters are only 
 used when they are defined by crystal symmetry.  An approximate (isotropic) 
 treatment of cell esds is used for estimating esds involving l.s. planes. 
; 
  
loop_ 
 _geom_bond_atom_site_label_1 
 _geom_bond_atom_site_label_2 
 _geom_bond_distance 
 _geom_bond_site_symmetry_2 
 _geom_bond_publ_flag 
C1 O1 1.213(3) . ? 
C1 N1 1.394(3) . ? 
C1 C2 1.507(3) . ? 
C2 C3 1.529(4) . ? 
C2 H2A 0.9900 . ? 
C2 H2B 0.9900 . ? 
C3 C4 1.500(3) . ? 
C3 H3A 0.9900 . ? 
C3 H3B 0.9900 . ? 
C4 O2 1.204(3) . ? 
C4 N1 1.397(3) . ? 
C5 C13 1.372(4) . ? 
C5 C6 1.403(4) . ? 
C5 N1 1.423(3) . ? 
C6 N2 1.369(3) . ? 
C6 C10 1.413(3) . ? 
C7 N2 1.325(3) . ? 
C7 C8 1.398(3) . ? 
C7 H7 0.9500 . ? 
C8 C9 1.363(4) . ? 
C8 H8 0.9500 . ? 
C9 C10 1.411(4) . ? 
C9 H9 0.9500 . ? 
C10 C11 1.419(4) . ? 
C11 C12 1.365(4) . ? 
C11 H11 0.9500 . ? 
C12 C13 1.408(3) . ? 
C12 H12 0.9500 . ? 
C13 H13 0.9500 . ? 
C14 O3 1.212(3) . ? 
C14 N3 1.397(3) . ? 
C14 C15 1.507(3) . ? 
C15 C16 1.527(4) . ? 
C15 H15A 0.9900 . ? 
C15 H15B 0.9900 . ? 
C16 C17 1.507(3) . ? 
C16 H16A 0.9900 . ? 
C16 H16B 0.9900 . ? 
C17 O4 1.209(3) . ? 
C17 N3 1.389(3) . ? 
C18 C26 1.356(4) . ? 
C18 C19 1.422(4) . ? 
C18 N3 1.429(3) . ? 
C19 N4 1.372(3) . ? 
C19 C23 1.420(3) . ? 
C20 N4 1.316(3) . ? 
C20 C21 1.406(4) . ? 
C20 H20 0.9500 . ? 
C21 C22 1.354(4) . ? 
C21 H21 0.9500 . ? 
C22 C23 1.427(4) . ? 
C22 H22 0.9500 . ? 
C23 C24 1.408(4) . ? 
C24 C25 1.362(4) . ? 
C24 H24 0.9500 . ? 
C25 C26 1.411(4) . ? 
C25 H25 0.9500 . ? 
C26 H26 0.9500 . ? 
N2 H2 0.89(3) . ? 
O5 H5A 0.93(2) . ? 
O5 H5B 0.92(2) . ? 
  
loop_ 
 _geom_angle_atom_site_label_1 
 _geom_angle_atom_site_label_2 
 _geom_angle_atom_site_label_3 
 _geom_angle 
 _geom_angle_site_symmetry_1 
 _geom_angle_site_symmetry_3 
 _geom_angle_publ_flag 
O1 C1 N1 122.8(2) . . ? 
O1 C1 C2 129.5(2) . . ? 
N1 C1 C2 107.6(2) . . ? 
C1 C2 C3 105.4(2) . . ? 
C1 C2 H2A 110.7 . . ? 
C3 C2 H2A 110.7 . . ? 
C1 C2 H2B 110.7 . . ? 
C3 C2 H2B 110.7 . . ? 
H2A C2 H2B 108.8 . . ? 
C4 C3 C2 105.6(2) . . ? 
C4 C3 H3A 110.6 . . ? 
C2 C3 H3A 110.6 . . ? 
C4 C3 H3B 110.6 . . ? 
C2 C3 H3B 110.6 . . ? 
H3A C3 H3B 108.8 . . ? 
O2 C4 N1 123.6(2) . . ? 
O2 C4 C3 128.6(2) . . ? 
N1 C4 C3 107.8(2) . . ? 
C13 C5 C6 119.6(2) . . ? 
C13 C5 N1 120.2(2) . . ? 
C6 C5 N1 120.3(2) . . ? 
N2 C6 C5 120.8(2) . . ? 
N2 C6 C10 118.4(2) . . ? 
C5 C6 C10 120.8(2) . . ? 
N2 C7 C8 120.5(2) . . ? 
N2 C7 H7 119.7 . . ? 
C8 C7 H7 119.7 . . ? 
C9 C8 C7 119.0(2) . . ? 
C9 C8 H8 120.5 . . ? 
C7 C8 H8 120.5 . . ? 
C8 C9 C10 120.8(2) . . ? 
C8 C9 H9 119.6 . . ? 
C10 C9 H9 119.6 . . ? 
C9 C10 C6 118.3(2) . . ? 
C9 C10 C11 123.5(2) . . ? 
C6 C10 C11 118.1(2) . . ? 
C12 C11 C10 120.3(2) . . ? 
C12 C11 H11 119.9 . . ? 
C10 C11 H11 119.9 . . ? 
C11 C12 C13 120.9(2) . . ? 
C11 C12 H12 119.5 . . ? 
C13 C12 H12 119.5 . . ? 
C5 C13 C12 120.3(3) . . ? 
C5 C13 H13 119.9 . . ? 
C12 C13 H13 119.9 . . ? 
O3 C14 N3 123.4(2) . . ? 
O3 C14 C15 128.6(2) . . ? 
N3 C14 C15 108.0(2) . . ? 
C14 C15 C16 105.4(2) . . ? 
C14 C15 H15A 110.7 . . ? 
C16 C15 H15A 110.7 . . ? 
C14 C15 H15B 110.7 . . ? 
C16 C15 H15B 110.7 . . ? 
H15A C15 H15B 108.8 . . ? 
C17 C16 C15 105.2(2) . . ? 
C17 C16 H16A 110.7 . . ? 
C15 C16 H16A 110.7 . . ? 
C17 C16 H16B 110.7 . . ? 
C15 C16 H16B 110.7 . . ? 
H16A C16 H16B 108.8 . . ? 
O4 C17 N3 123.2(2) . . ? 
O4 C17 C16 128.5(2) . . ? 
N3 C17 C16 108.3(2) . . ? 
C26 C18 C19 121.1(2) . . ? 
C26 C18 N3 119.9(2) . . ? 
C19 C18 N3 119.0(2) . . ? 
N4 C19 C23 123.3(2) . . ? 
N4 C19 C18 119.2(2) . . ? 
C23 C19 C18 117.6(2) . . ? 
N4 C20 C21 124.4(3) . . ? 
N4 C20 H20 117.8 . . ? 
C21 C20 H20 117.8 . . ? 
C22 C21 C20 119.5(3) . . ? 
C22 C21 H21 120.3 . . ? 
C20 C21 H21 120.3 . . ? 
C21 C22 C23 119.3(2) . . ? 
C21 C22 H22 120.3 . . ? 
C23 C22 H22 120.3 . . ? 
C24 C23 C19 120.4(2) . . ? 
C24 C23 C22 122.8(2) . . ? 
C19 C23 C22 116.7(2) . . ? 
C25 C24 C23 120.0(2) . . ? 
C25 C24 H24 120.0 . . ? 
C23 C24 H24 120.0 . . ? 
C24 C25 C26 120.5(3) . . ? 
C24 C25 H25 119.8 . . ? 
C26 C25 H25 119.8 . . ? 
C18 C26 C25 120.5(3) . . ? 
C18 C26 H26 119.8 . . ? 
C25 C26 H26 119.8 . . ? 
C1 N1 C4 113.42(19) . . ? 
C1 N1 C5 123.2(2) . . ? 
C4 N1 C5 123.2(2) . . ? 
C7 N2 C6 123.0(2) . . ? 
C7 N2 H2 116.5(17) . . ? 
C6 N2 H2 120.5(17) . . ? 
C17 N3 C14 113.03(19) . . ? 
C17 N3 C18 123.1(2) . . ? 
C14 N3 C18 123.8(2) . . ? 
C20 N4 C19 116.8(2) . . ? 
H5A O5 H5B 99(3) . . ? 
  
loop_ 
 _geom_torsion_atom_site_label_1 
 _geom_torsion_atom_site_label_2 
 _geom_torsion_atom_site_label_3 
 _geom_torsion_atom_site_label_4 
 _geom_torsion 
 _geom_torsion_site_symmetry_1 
 _geom_torsion_site_symmetry_2 
 _geom_torsion_site_symmetry_3 
 _geom_torsion_site_symmetry_4 
 _geom_torsion_publ_flag 
O1 C1 C2 C3 -176.7(3) . . . . ? 
N1 C1 C2 C3 3.4(3) . . . . ? 
C1 C2 C3 C4 -3.0(3) . . . . ? 
C2 C3 C4 O2 -178.8(2) . . . . ? 
C2 C3 C4 N1 1.6(3) . . . . ? 
C13 C5 C6 N2 179.3(2) . . . . ? 
N1 C5 C6 N2 -0.7(4) . . . . ? 
C13 C5 C6 C10 -2.2(4) . . . . ? 
N1 C5 C6 C10 177.8(2) . . . . ? 
N2 C7 C8 C9 0.2(4) . . . . ? 
C7 C8 C9 C10 0.2(4) . . . . ? 
C8 C9 C10 C6 -0.7(4) . . . . ? 
C8 C9 C10 C11 -179.1(3) . . . . ? 
N2 C6 C10 C9 0.8(4) . . . . ? 
C5 C6 C10 C9 -177.7(2) . . . . ? 
N2 C6 C10 C11 179.3(2) . . . . ? 
C5 C6 C10 C11 0.8(4) . . . . ? 
C9 C10 C11 C12 179.2(3) . . . . ? 
C6 C10 C11 C12 0.8(4) . . . . ? 
C10 C11 C12 C13 -1.0(4) . . . . ? 
C6 C5 C13 C12 2.0(4) . . . . ? 
N1 C5 C13 C12 -177.9(2) . . . . ? 
C11 C12 C13 C5 -0.5(4) . . . . ? 
O3 C14 C15 C16 -178.9(3) . . . . ? 
N3 C14 C15 C16 1.6(3) . . . . ? 
C14 C15 C16 C17 -2.7(3) . . . . ? 
C15 C16 C17 O4 -177.0(3) . . . . ? 
C15 C16 C17 N3 3.0(3) . . . . ? 
C26 C18 C19 N4 178.9(2) . . . . ? 
N3 C18 C19 N4 -1.9(4) . . . . ? 
C26 C18 C19 C23 -2.1(4) . . . . ? 
N3 C18 C19 C23 177.0(2) . . . . ? 
N4 C20 C21 C22 1.5(5) . . . . ? 
C20 C21 C22 C23 -0.3(4) . . . . ? 
N4 C19 C23 C24 179.8(2) . . . . ? 
C18 C19 C23 C24 0.9(4) . . . . ? 
N4 C19 C23 C22 1.9(4) . . . . ? 
C18 C19 C23 C22 -177.0(2) . . . . ? 
C21 C22 C23 C24 -179.0(3) . . . . ? 
C21 C22 C23 C19 -1.2(4) . . . . ? 
C19 C23 C24 C25 0.5(4) . . . . ? 
C22 C23 C24 C25 178.2(3) . . . . ? 
C23 C24 C25 C26 -0.6(4) . . . . ? 
C19 C18 C26 C25 2.1(4) . . . . ? 
N3 C18 C26 C25 -177.1(2) . . . . ? 
C24 C25 C26 C18 -0.7(4) . . . . ? 
O1 C1 N1 C4 177.4(2) . . . . ? 
C2 C1 N1 C4 -2.6(3) . . . . ? 
O1 C1 N1 C5 -6.2(4) . . . . ? 
C2 C1 N1 C5 173.8(2) . . . . ? 
O2 C4 N1 C1 -179.0(2) . . . . ? 
C3 C4 N1 C1 0.7(3) . . . . ? 
O2 C4 N1 C5 4.6(4) . . . . ? 
C3 C4 N1 C5 -175.7(2) . . . . ? 
C13 C5 N1 C1 -98.1(3) . . . . ? 
C6 C5 N1 C1 81.9(3) . . . . ? 
C13 C5 N1 C4 77.9(3) . . . . ? 
C6 C5 N1 C4 -102.1(3) . . . . ? 
C8 C7 N2 C6 -0.2(4) . . . . ? 
C5 C6 N2 C7 178.1(2) . . . . ? 
C10 C6 N2 C7 -0.3(4) . . . . ? 
O4 C17 N3 C14 177.8(2) . . . . ? 
C16 C17 N3 C14 -2.1(3) . . . . ? 
O4 C17 N3 C18 -3.1(4) . . . . ? 
C16 C17 N3 C18 177.0(2) . . . . ? 
O3 C14 N3 C17 -179.2(2) . . . . ? 
C15 C14 N3 C17 0.3(3) . . . . ? 
O3 C14 N3 C18 1.7(4) . . . . ? 
C15 C14 N3 C18 -178.8(2) . . . . ? 
C26 C18 N3 C17 -96.8(3) . . . . ? 
C19 C18 N3 C17 84.0(3) . . . . ? 
C26 C18 N3 C14 82.2(3) . . . . ? 
C19 C18 N3 C14 -97.0(3) . . . . ? 
C21 C20 N4 C19 -0.8(4) . . . . ? 
C23 C19 N4 C20 -0.9(4) . . . . ? 
C18 C19 N4 C20 178.0(2) . . . . ? 
  
loop_ 
 _geom_hbond_atom_site_label_D 
 _geom_hbond_atom_site_label_H 
 _geom_hbond_atom_site_label_A 
 _geom_hbond_distance_DH 
 _geom_hbond_distance_HA 
 _geom_hbond_distance_DA 
 _geom_hbond_angle_DHA 
 _geom_hbond_site_symmetry_A 
N2 H2 Cl1  0.89(3) 2.13(3) 2.984(2) 162(2) . 
O5 H5A Cl1  0.93(2) 2.23(2) 3.158(2) 174(3) . 
O5 H5B N4  0.92(2) 2.03(3) 2.944(3) 177(3) . 
  
_diffrn_measured_fraction_theta_max    1.000 
_diffrn_reflns_theta_full              26.41 
_diffrn_measured_fraction_theta_full   1.000 
_refine_diff_density_max    0.308 
_refine_diff_density_min   -0.178 
_refine_diff_density_rms    0.052 

_vrf_PLAT113_bd75ass
;
PROBLEM: ADDSYM Suggests Possible Pseudo/New Space-group.       Pbcn     
RESPONSE: False positive due to pseudosymmetry.  The C13H10N2O2 / C13H11N2O2
species are consistent with the presence of an inversion center (if the proton
H2 is ignored), but the Cl and H2O molecules are not.  The center of symmetry
in Pbcn relates the Cl and H2O positions, and a true center of symmetry
requires these atoms to be equivalent.  Therefore acentric Pna21 is the correct
space group.

This alert arose because in the ADDSYM program in CHECKCIF "Atoms are treated
as having the same atom type in order to catch certain types of disorder or
incorrect atom type assignment"
;

_vrf_PLAT111_bd75ass
;
PROBLEM: ADDSYM Suggests Possible Pseudo/New Space-group.       Pbcn     
RESPONSE: False positive due to pseudosymmetry.  The C13H10N2O2 / C13H11N2O2
species are consistent with the presence of an inversion center (if the proton
H2 is ignored), but the Cl and H2O molecules are not.  The center of symmetry
in Pbcn relates the Cl and H2O positions, and a true center of symmetry
requires these atoms to be equivalent.  Therefore acentric Pna21 is the correct
space group.

This alert arose because in the ADDSYM program in CHECKCIF "Atoms are treated
as having the same atom type in order to catch certain types of disorder or
incorrect atom type assignment"
;
